# Supplementary material for: Source identification and risk assessment of potentially toxic elements in surface soil of townships in the northwest Hebei region
Source: Research Square preprint supplement (doi:10.21203/rs.3.rs-7595488/v1), 2025-10-08
Supplement: Supplementary file 1 [file ce5a730abb885a2a958ec07d.docx]

Supporting Data

**Source identification and risk assessment of potentially toxic elements in surface soil of townships in the northwest Hebei region**

**Zhanbin Wang**a**,**†**, Daokun Chen**a**,**†**,*****, Xinbin Li**a**,b,*****, Ke Yang**a**, Dongxiang Jiang**a**, Donglin Wang**a**, Liannan Shang**a**, Yuekun Wang**a**, Tao He**c

a Xi’an Mineral Resources Survey, China Geological Survey, Xi'an 710100 China

b Qinling--Loess Plateau Transition Zone Observation and Research Station for Coupling of Soil and Water Elements and Conservation of Biological Resources

c Research Center of Applied Geology of China Geological Survey, Chengdu 610036 China

* Corresponding author, e-mail: [cdkun1008@163.com](mailto:cdkun1008@163.com)，lixinbin@mail.cgs.gov.cn

† These authors contributed equally to this work

### Table S1

Grading criteria for potential ecological risk factor and potential ecological risk index

| Grade classification（Eir） | Grade classification（RI） | Pollution level |
| --- | --- | --- |
| <40 | RI<150 | Low risk |
| 40≤＜80 | 150≤RI<300 | Moderate risk |
| 80≤＜160 | 300≤RI<600 | Considerable risk |
| 160≤＜320 | RI≥600 | High risk |
| ≥320 | - | Very high risk |

### Table S2

Reference values of exposure parameters for human health risk assessment[1]

| Parameter | Parameter | Unit | adult | Children |
| --- | --- | --- | --- | --- |
| IngR | Ingestion rate of soil | mg/day | 100 | 200 |
| InhR | Inhalation rate of soil | m3/day | 14.5 | 7.5 |
| EF | Exposure frequency | day/year | 350 | 350 |
| ED | Exposure duration | year | 24 | 6 |
| BW | Body weight | kg | 56.8 | 15.9 |
| AT | Average exposure time (carcinogens) | day | 25550 | 25550 |
| Average exposure time ( non-carcinogens) | day | 8760 | 2190 |
| PEF | Particle emission factor | m3/kg | 1.36E+09 | 1.36E+09 |
| SA | Skin area available for soil contact | cm2 | 5075 | 2448 |
| AF | Soil-to-skin adherence factor | mg/cm2/day | 0.07 | 0.2 |
| ABS | Absorption factor | - | 0.001 | 0.001 |

### Table S3

Distributional characteristics of parameters in monte carlo simulations

| Heavy metals | *RfD*（mg） | | |  | *SF*（） | | |
| --- | --- | --- | --- | --- | --- | --- | --- |
| ingestion | inhalation | dermal  contact |  | ingestion | inhalation | dermal contact |
| Cr[1] | 3.00E-03 | 2.86E-05 | 6.00E-05 |  | 5.00E-01 | 4.20E+01 | 2.00E+01 |
| Ni[1] | 2.00E-02 | 2.06E-02 | 5.40E-03 |  | 1.70E+00 | 8.40E-01 | 4.25E+01 |
| As[2] | 3.00E-04 | 1.23E-04 | 3.00E-04 |  | 1.50E+00 | 1.51E+01 | 3.66E+00 |
| Hg[2] | 1.60E-04 | 8.60E-05 | 3.00E-04 |  | - | - | - |
| Cu[3] | 4.00E-02 | 4.02E-02 | 1.20E-02 |  | - | - | - |
| Zn[3] | 3.00E-01 | 3.00E-01 | 6.00E-02 |  | - | - | - |
| Cd[3] | 1.00E-03 | 1.00E-05 | 1.00E-05 |  | 5.10E-01 | 6.30E+00 | 2.00E+01 |
| Pb[3] | 3.50E-03 | 3.50E-03 | 5.25E-04 |  | 8.50E-03 | - | - |

### Table S4

Distribution settings for each parameter in the Monte Carlo simulation[4]

| Parameter | Unit | Type |
| --- | --- | --- |
| IngR | mg/day | lognormal |
| InhR | m3/day | lognormal |
| EF | day/year | trigular |
| ED | year | uniform |
| BW | kg | normal |
| AT | day | point |
| PEF | m3/kg | point |
| SA | cm2 | lognormal |
| AF | mg/cm2/day | Beta |
| ABS | - | point |

### Table S5

Principal component analysis of soil trace elements in the study area

| PCA | Initial eigenvalue | | |  | Extract the sum of the squares of the loads | | |  | Rotational load square sum | | |
| --- | --- | --- | --- | --- | --- | --- | --- | --- | --- | --- | --- |
|  |  |
| Total | Var(%) | Acc(%) |  | Total | Var(%) | Acc(%) |  | Total | Var(%) | Acc(%) |
| 1 | 3.870 | 48.38 | 48.38 |  | 3.870 | 48.38 | 48.38 |  | 3.294 | 41.17 | 41.17 |
| 2 | 1.398 | 17.48 | 65.86 |  | 1.398 | 17.48 | 65.86 |  | 1.080 | 13.50 | 54.67 |
| 3 | 0.952 | 11.91 | 77.76 |  | 0.952 | 11.91 | 77.76 |  | 1.040 | 13.00 | 67.67 |
| 4 | 0.659 | 8.24 | 86.00 |  | 0.659 | 8.24 | 86.00 |  | 1.019 | 12.73 | 80.41 |
| 5 | 0.556 | 6.95 | 92.95 |  | 0.556 | 6.95 | 92.95 |  | 1.004 | 12.55 | 92.95 |
| 6 | 0.252 | 3.15 | 96.11 |  |  |  |  |  |  |  |  |
| 7 | 0.195 | 2.43 | 98.54 |  |  |  |  |  |  |  |  |
| 8 | 0.117 | 1.46 | 100.00 |  |  |  |  |  |  |  |  |

### Figure SI

The factor loading matrix after rotation


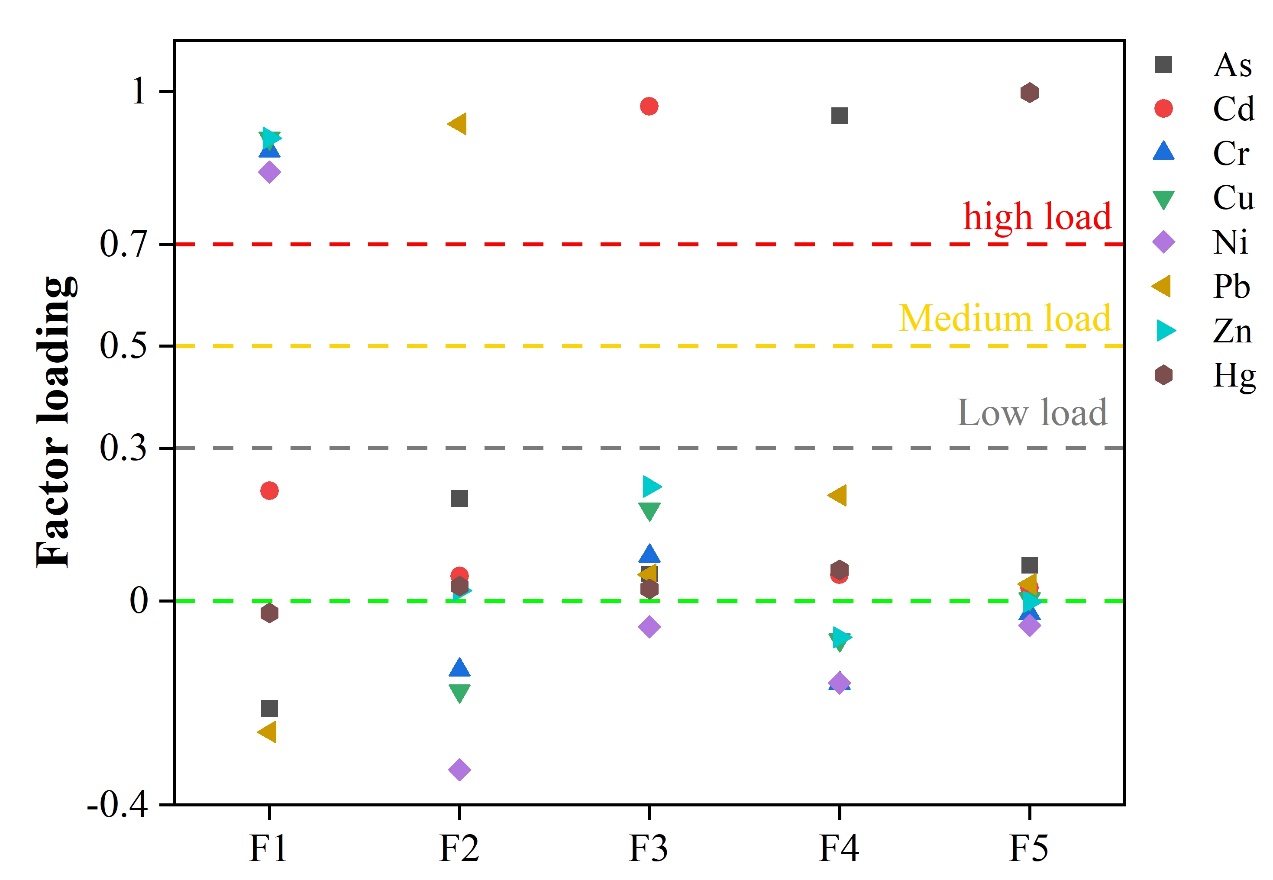


# References

[1] Z. Liu, Q. Du, Q. Guan, H. Luo, Y. Shan, W. Shao, A Monte Carlo simulation-based health risk assessment of heavy metals in soils of an oasis agricultural region in northwest China, Sci. Total Environ. 857 (2023) 159543. https://doi.org/10.1016/j.scitotenv.2022.159543.

[2] C. Lin, W. Wang, G. Hu, R. Yu, H. Huang, D. Liao, Incorporating source apportionment and bioaccessibility into human health risk assessment of heavy metals in a soil-rice system in the Jiulong River basin, southeast China, Journal of Food Composition and Analysis 124 (2023) 105692. https://doi.org/10.1016/j.jfca.2023.105692.

[3] L. Liu, Y. Li, X. Gu, R.X.S. Tulcan, L. Yan, C. Lin, J. Pan, Priority sources identification and risks assessment of heavy metal(loid)s in agricultural soils of a typical antimony mining watershed, Journal of Environmental Sciences 147 (2025) 153–164. https://doi.org/10.1016/j.jes.2023.11.007.

[4] R. Ramesh, M. Subramanian, E. Lakshmanan, A. Subramaniyan, G. Ganesan, Human health risk assessment using Monte Carlo simulations for groundwater with uranium in southern India, Ecotoxicology and Environmental Safety 226 (2021) 112781. https://doi.org/10.1016/j.ecoenv.2021.112781.
